# Supplementary material for: Surface Air Temperature Fluctuations and Lapse Rates on Olivares Gamma Glacier, Rio Olivares Basin, Central Chile, from a Novel Meteorological Sensor Network
Source: Hindawi journal article supplement (doi:10.1155/2017/6581537), 2017-01-01

## Supplementary Information

**Figure S1:** Surface air temperature profiles for all ten Tinytag sensors, with accompanying Logtag temperature profiles discussed in Section 3.5. See Table 1 and Figure 1 for details of sensor locations and heights above surface (1-m and 2-m).

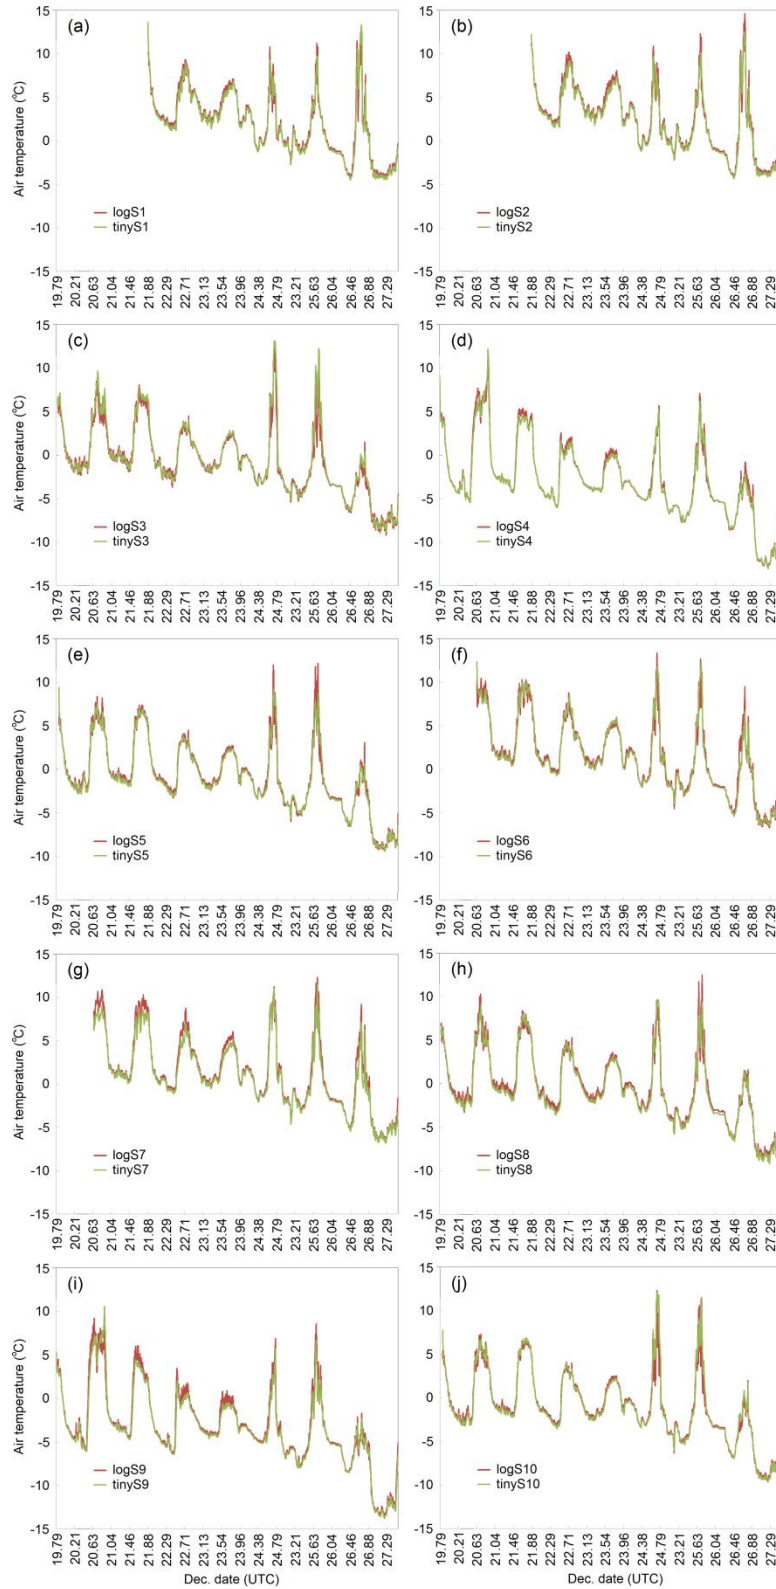

**Figure S2:** Mean daily cycles (22-26 March 2015) of data shown in Figure S1.

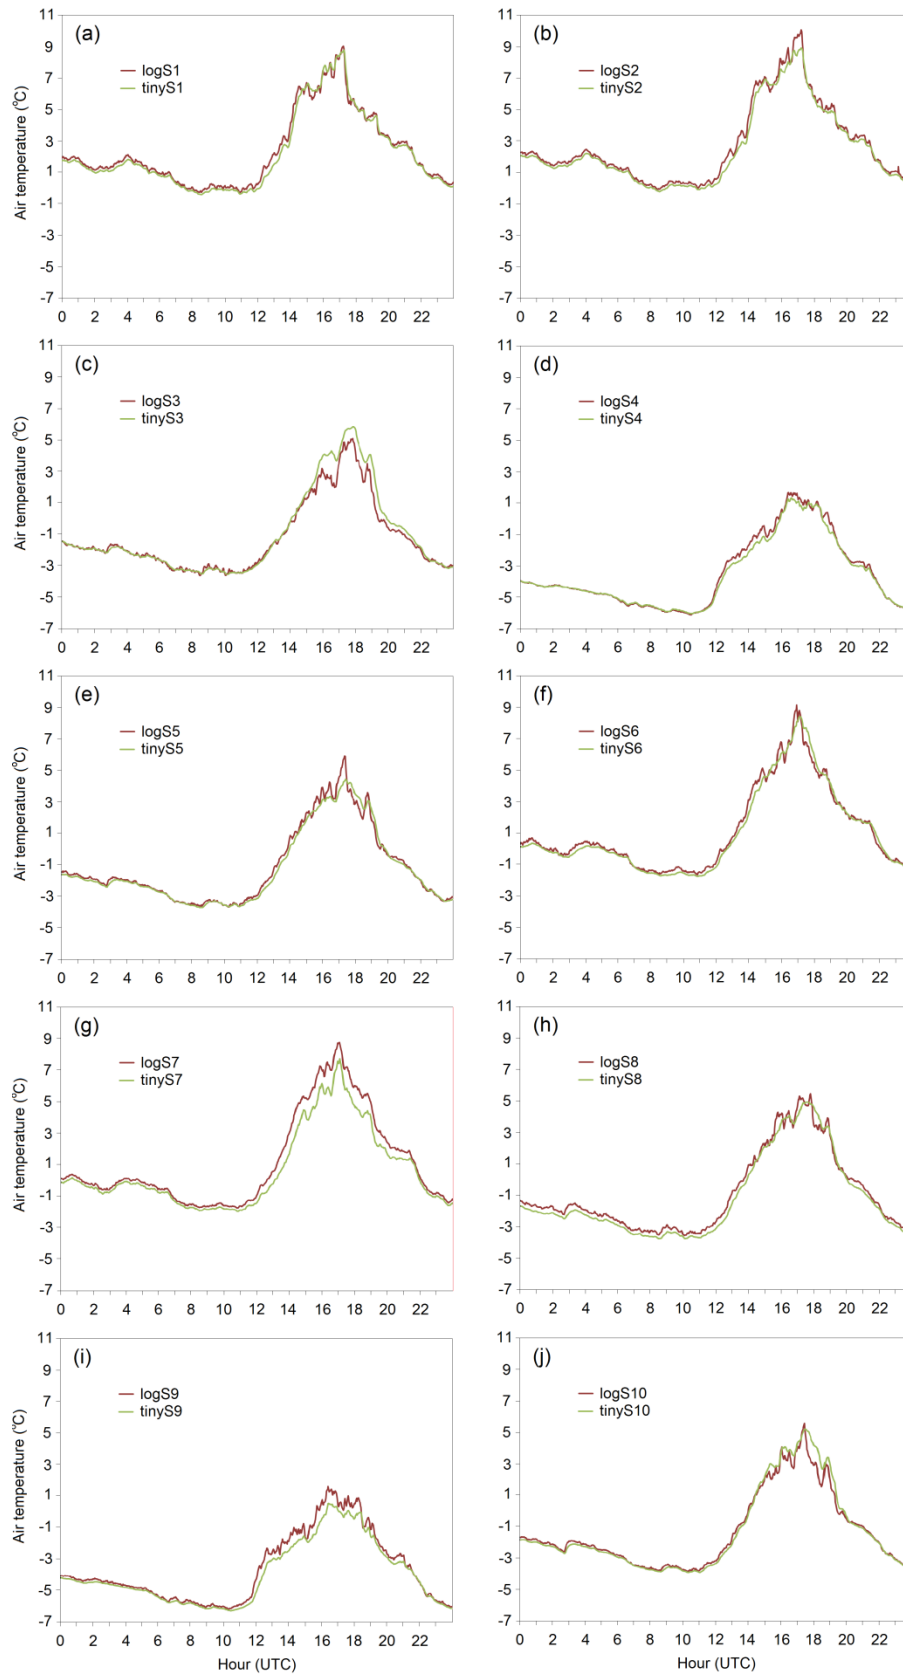

Supplement: f1 [file 6581537.f1.pdf]
